# Supplementary material
Source: PubMed Central journal article supplement (PMC1584257)

Fluorescence Ratio in Sliding Window of 10 Genes

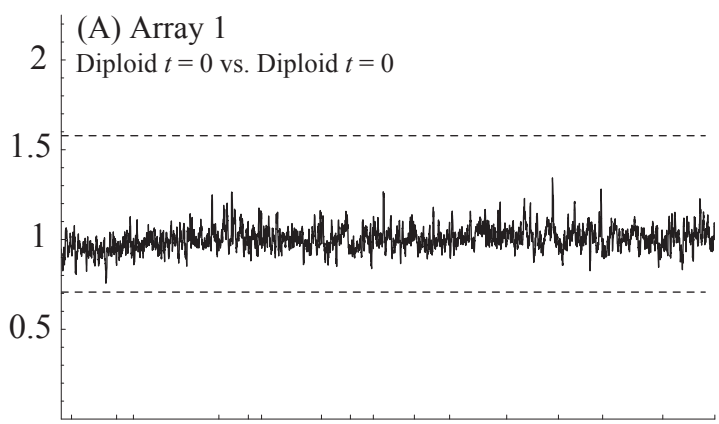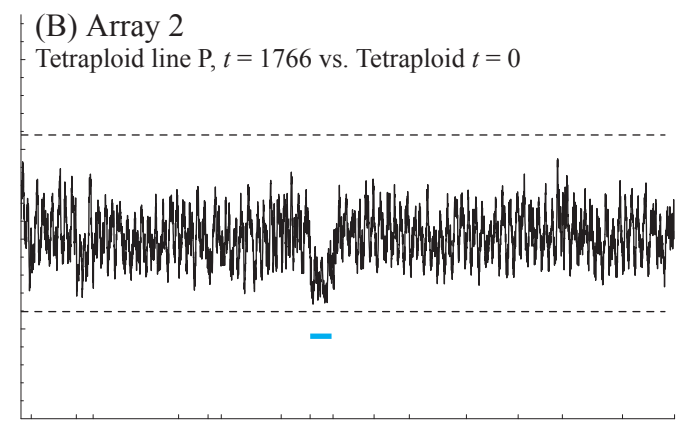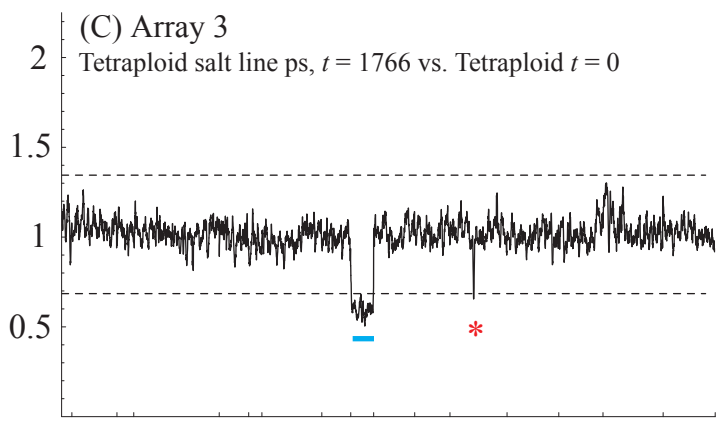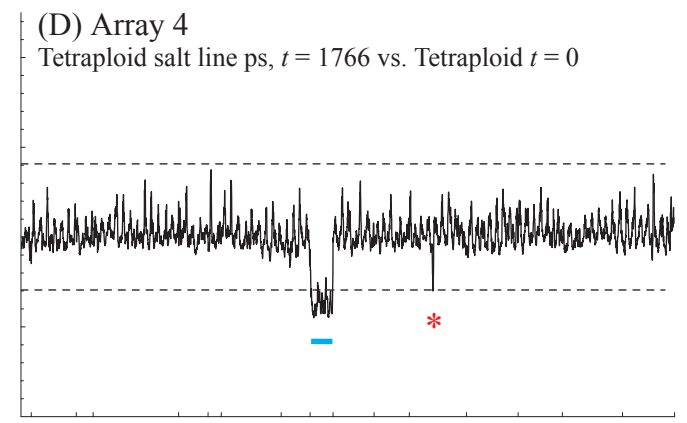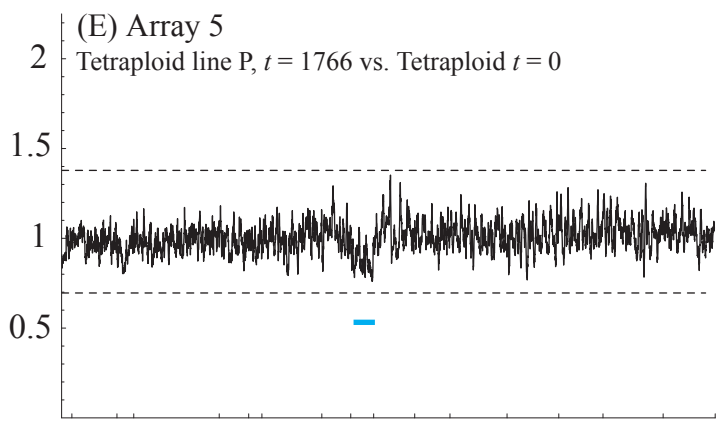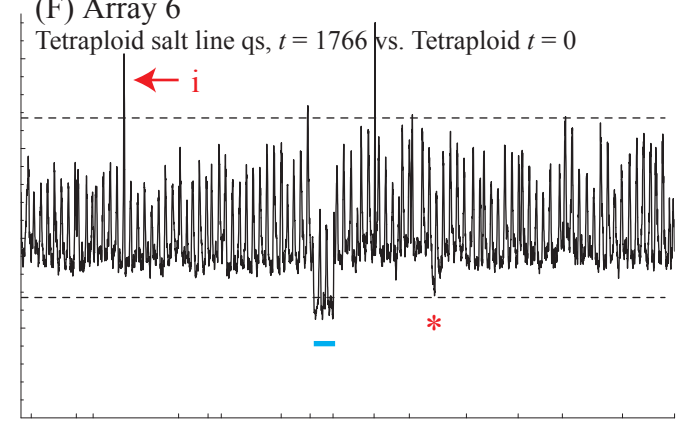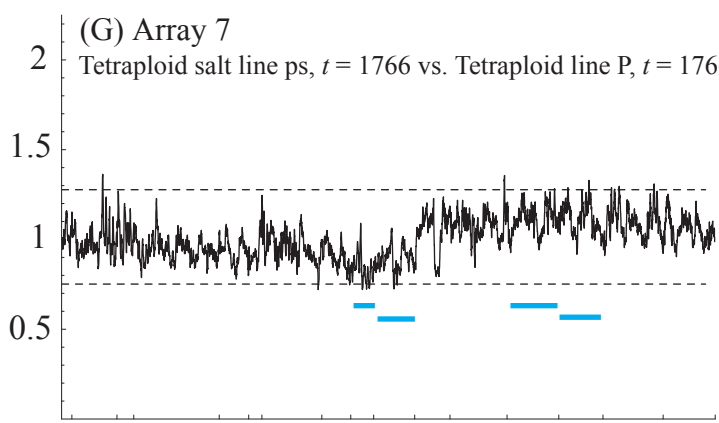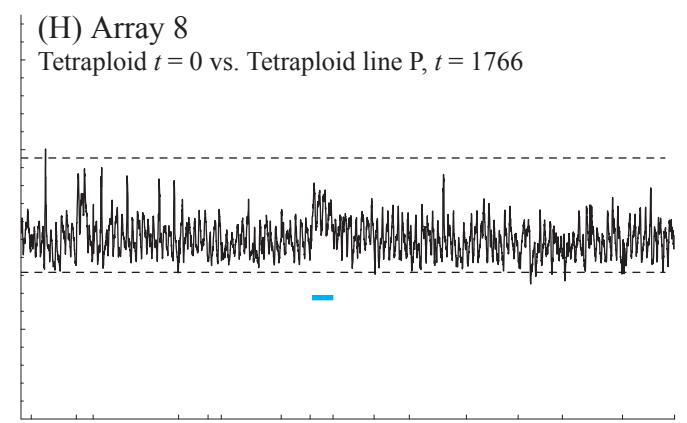

1 2 3 4 5 6 7 8 9 10 11 12 13 14 15 16  
Chromosome

1 2 3 4 5 6 7 8 9 10 11 12 13 14 15 16  
Chromosome

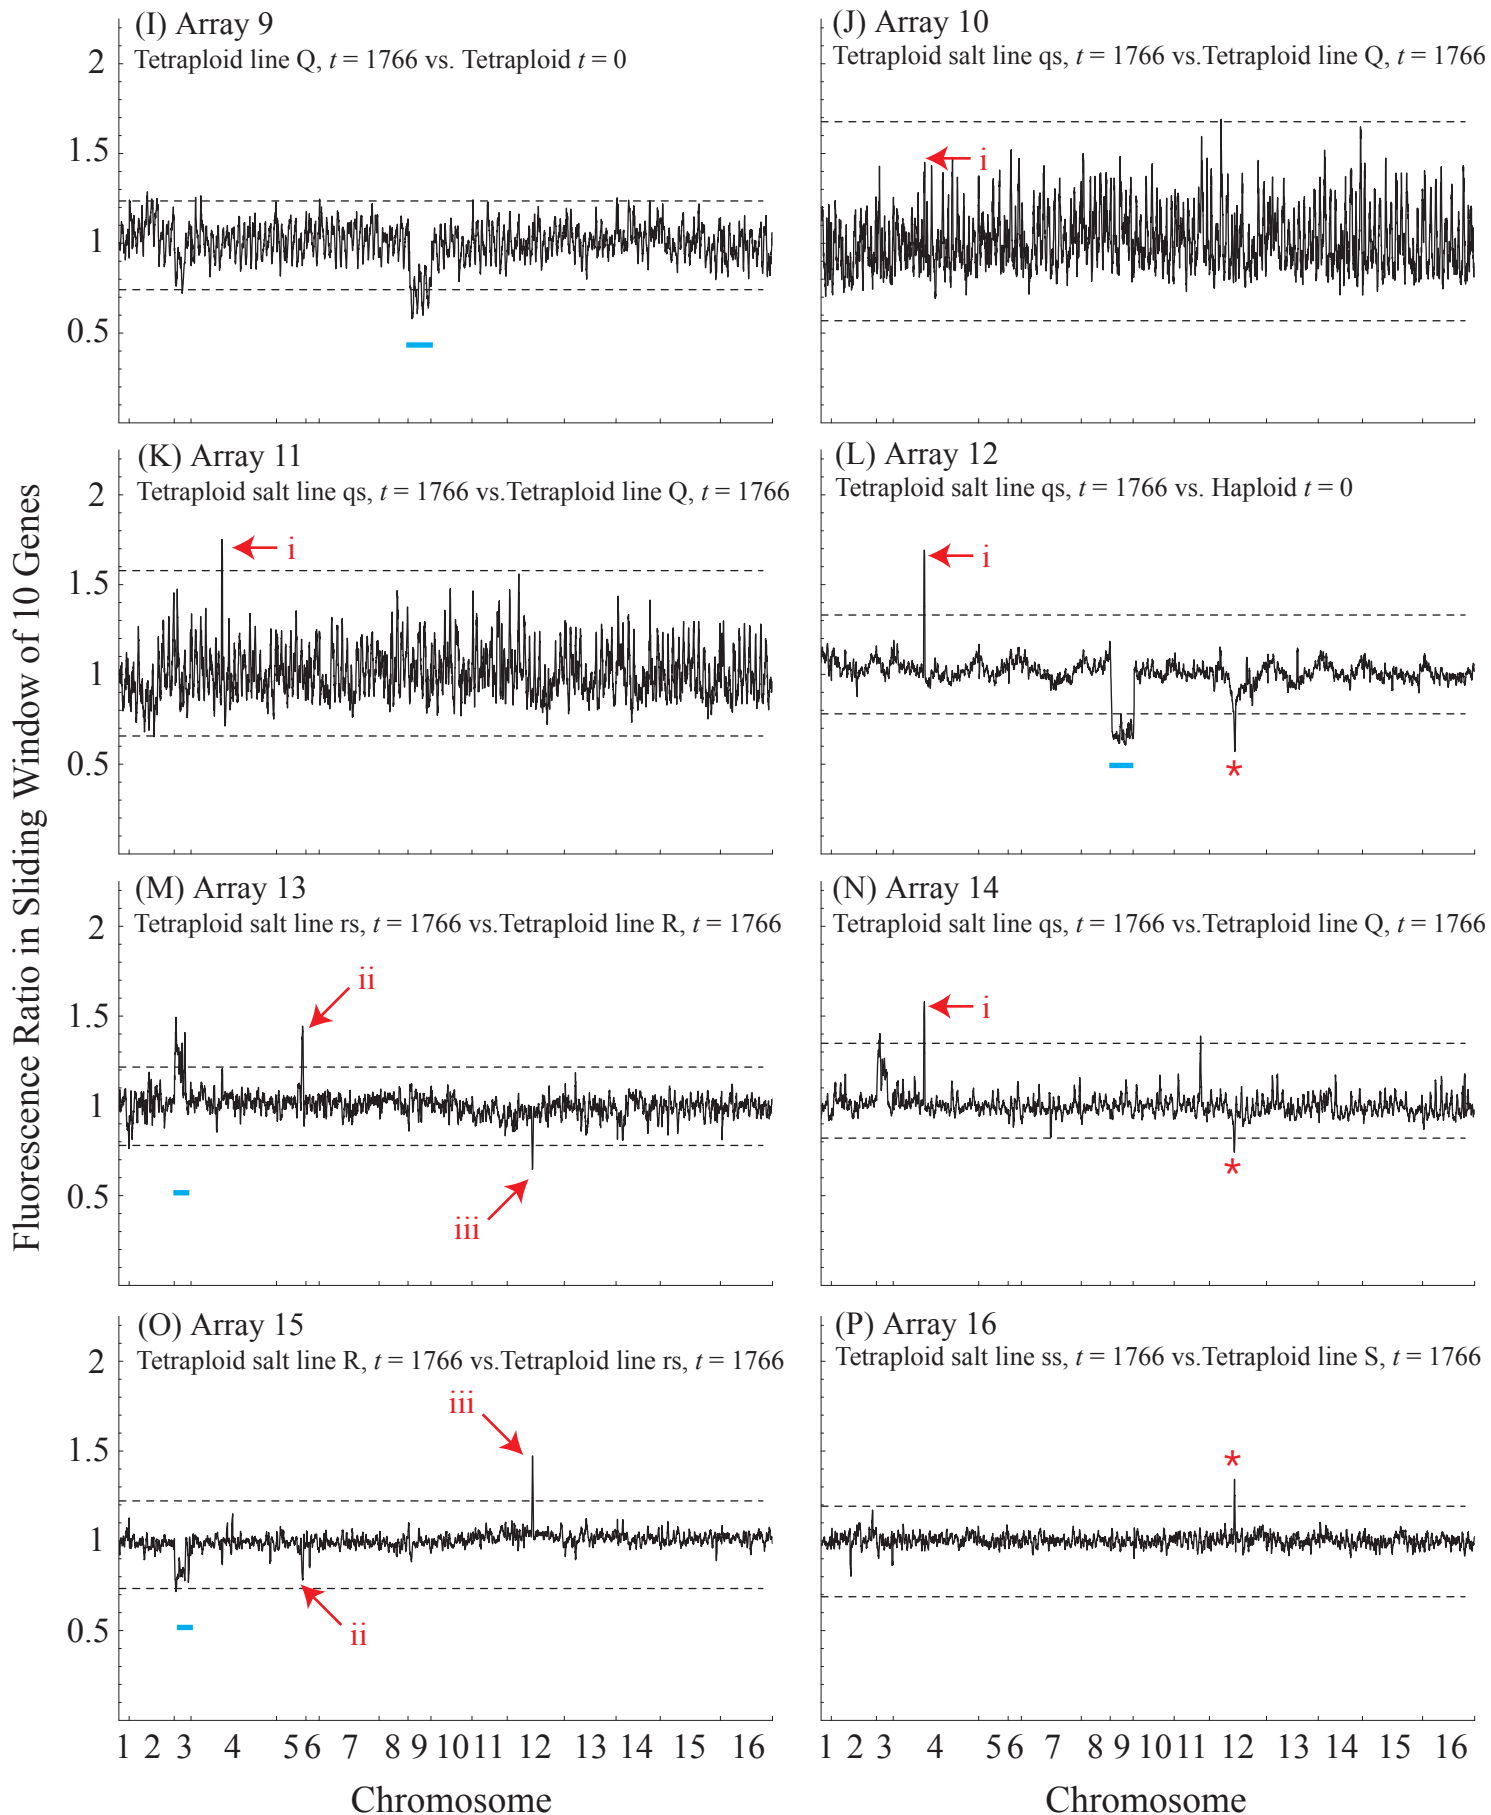

Fluorescence Ratio in Sliding Window of 10 Genes

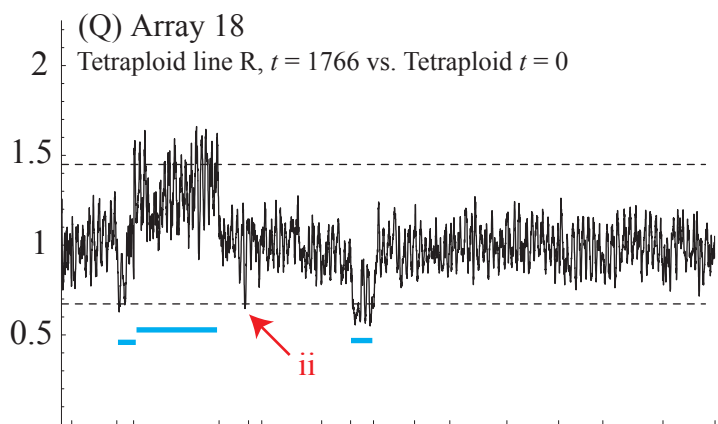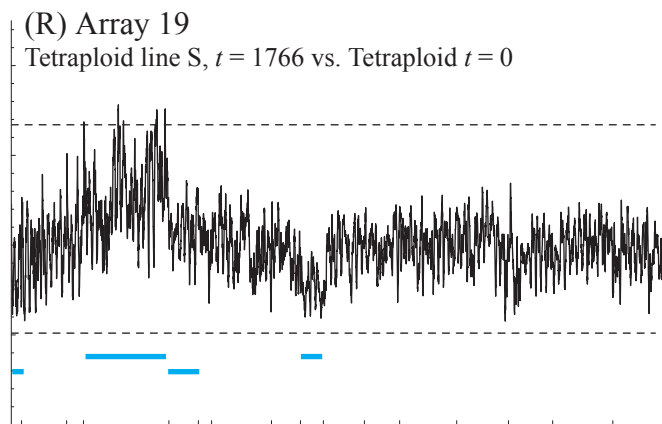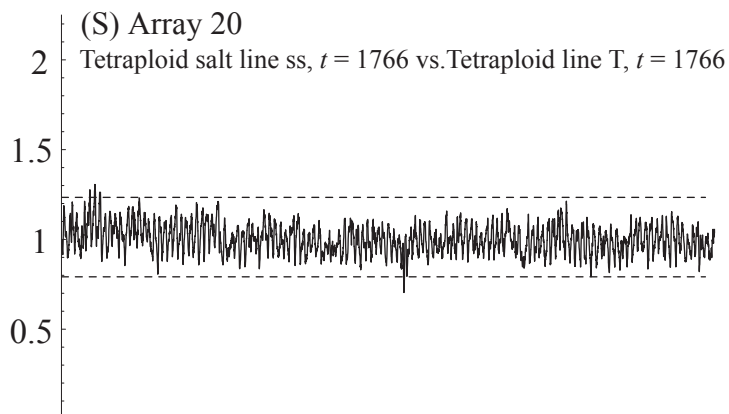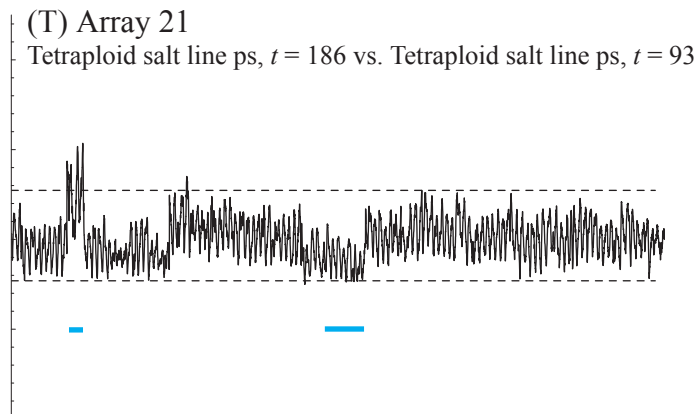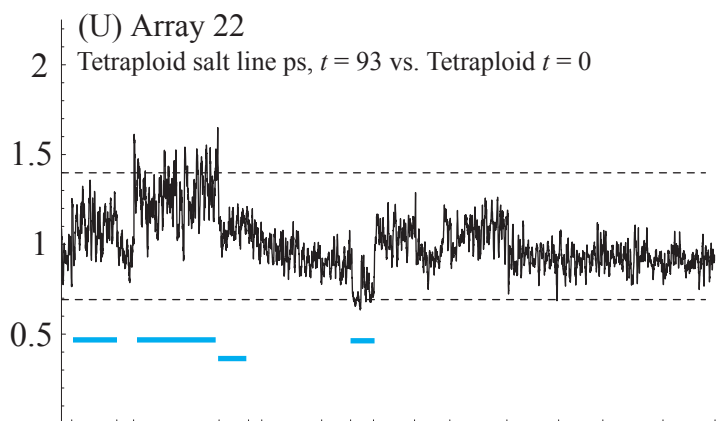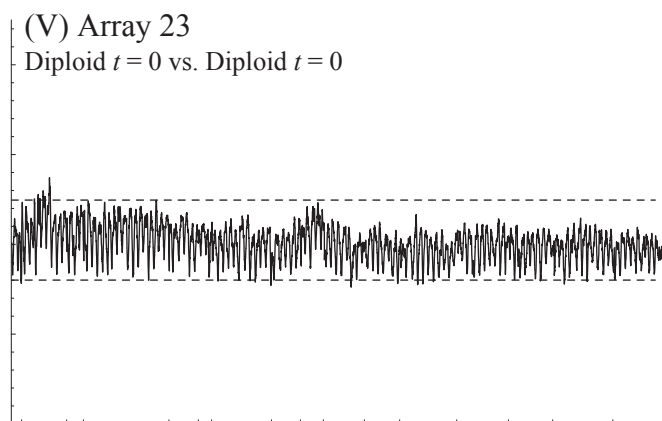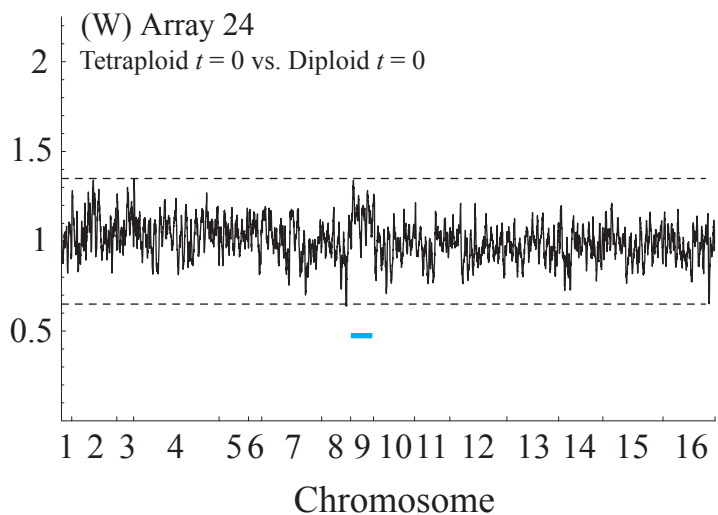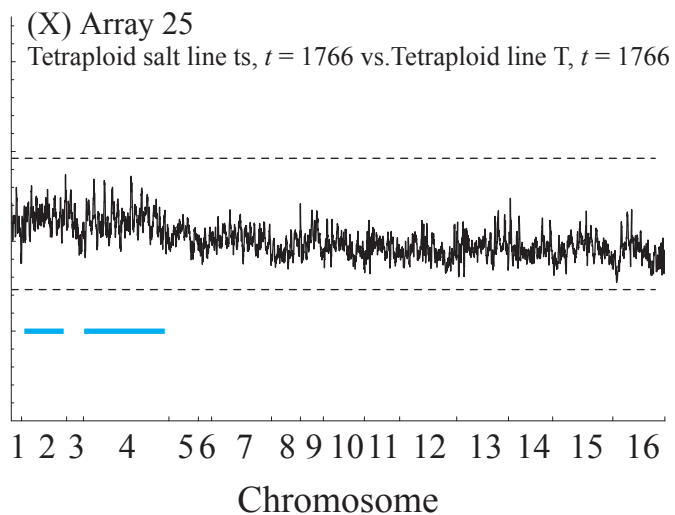

Fluorescence Ratio in Sliding Window of 10 Genes

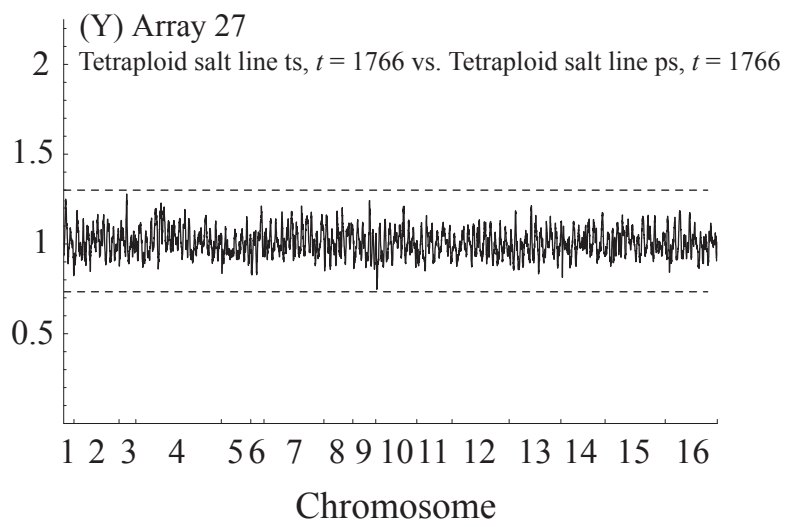

Supplement: pgen.0020145.sg006.pdf [file pgen.0020145.sg006.pdf]
