# Supplementary material
Source: PubMed Central journal article supplement (PMC1584257)

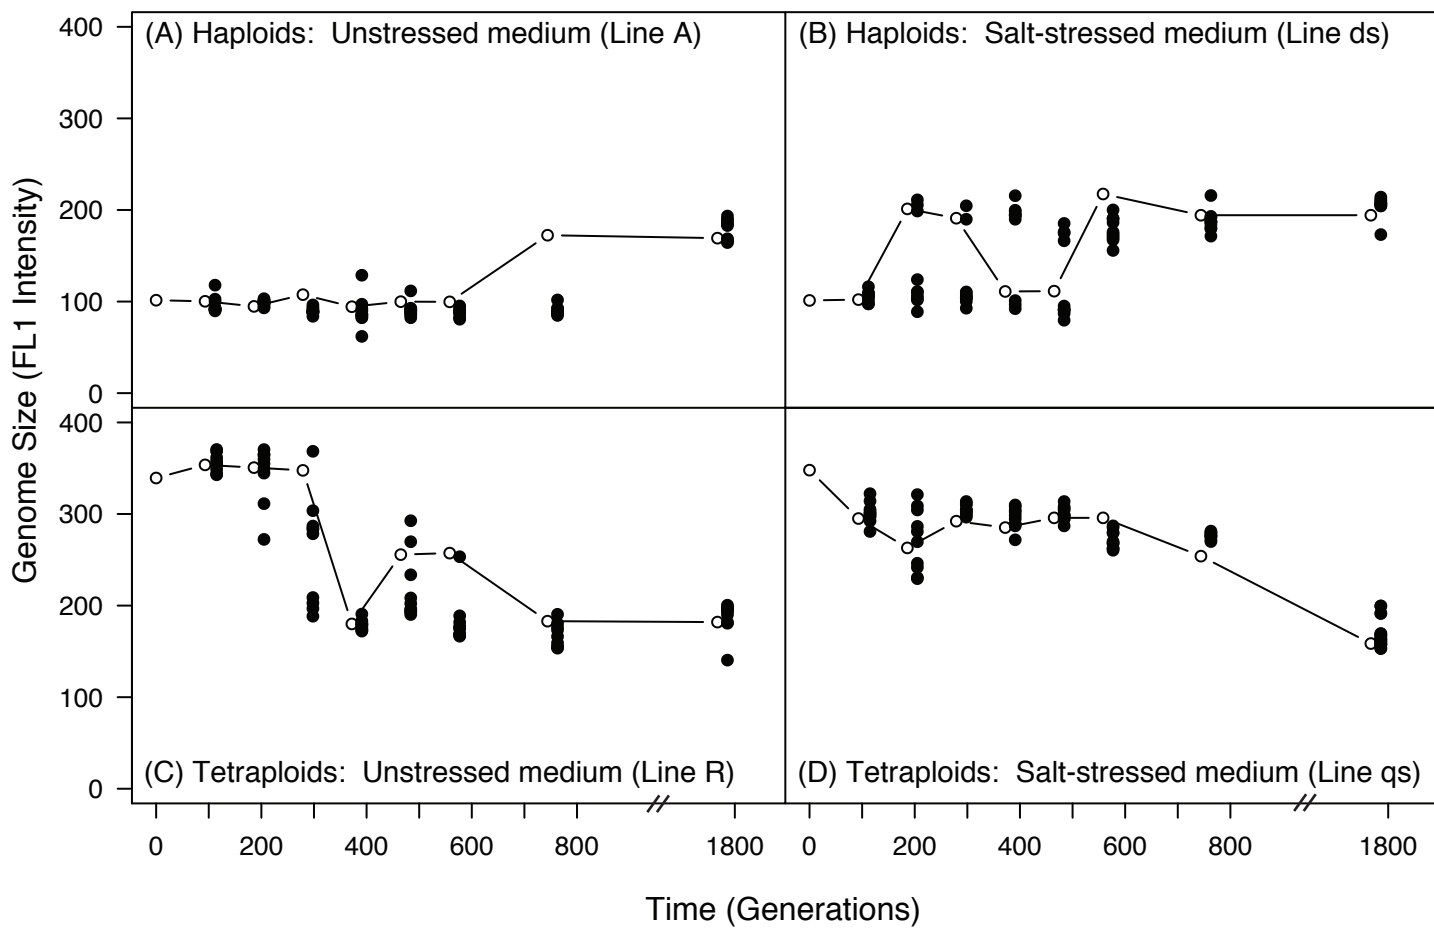

Supplement: pgen.0020145.sg001.pdf [file pgen.0020145.sg001.pdf]

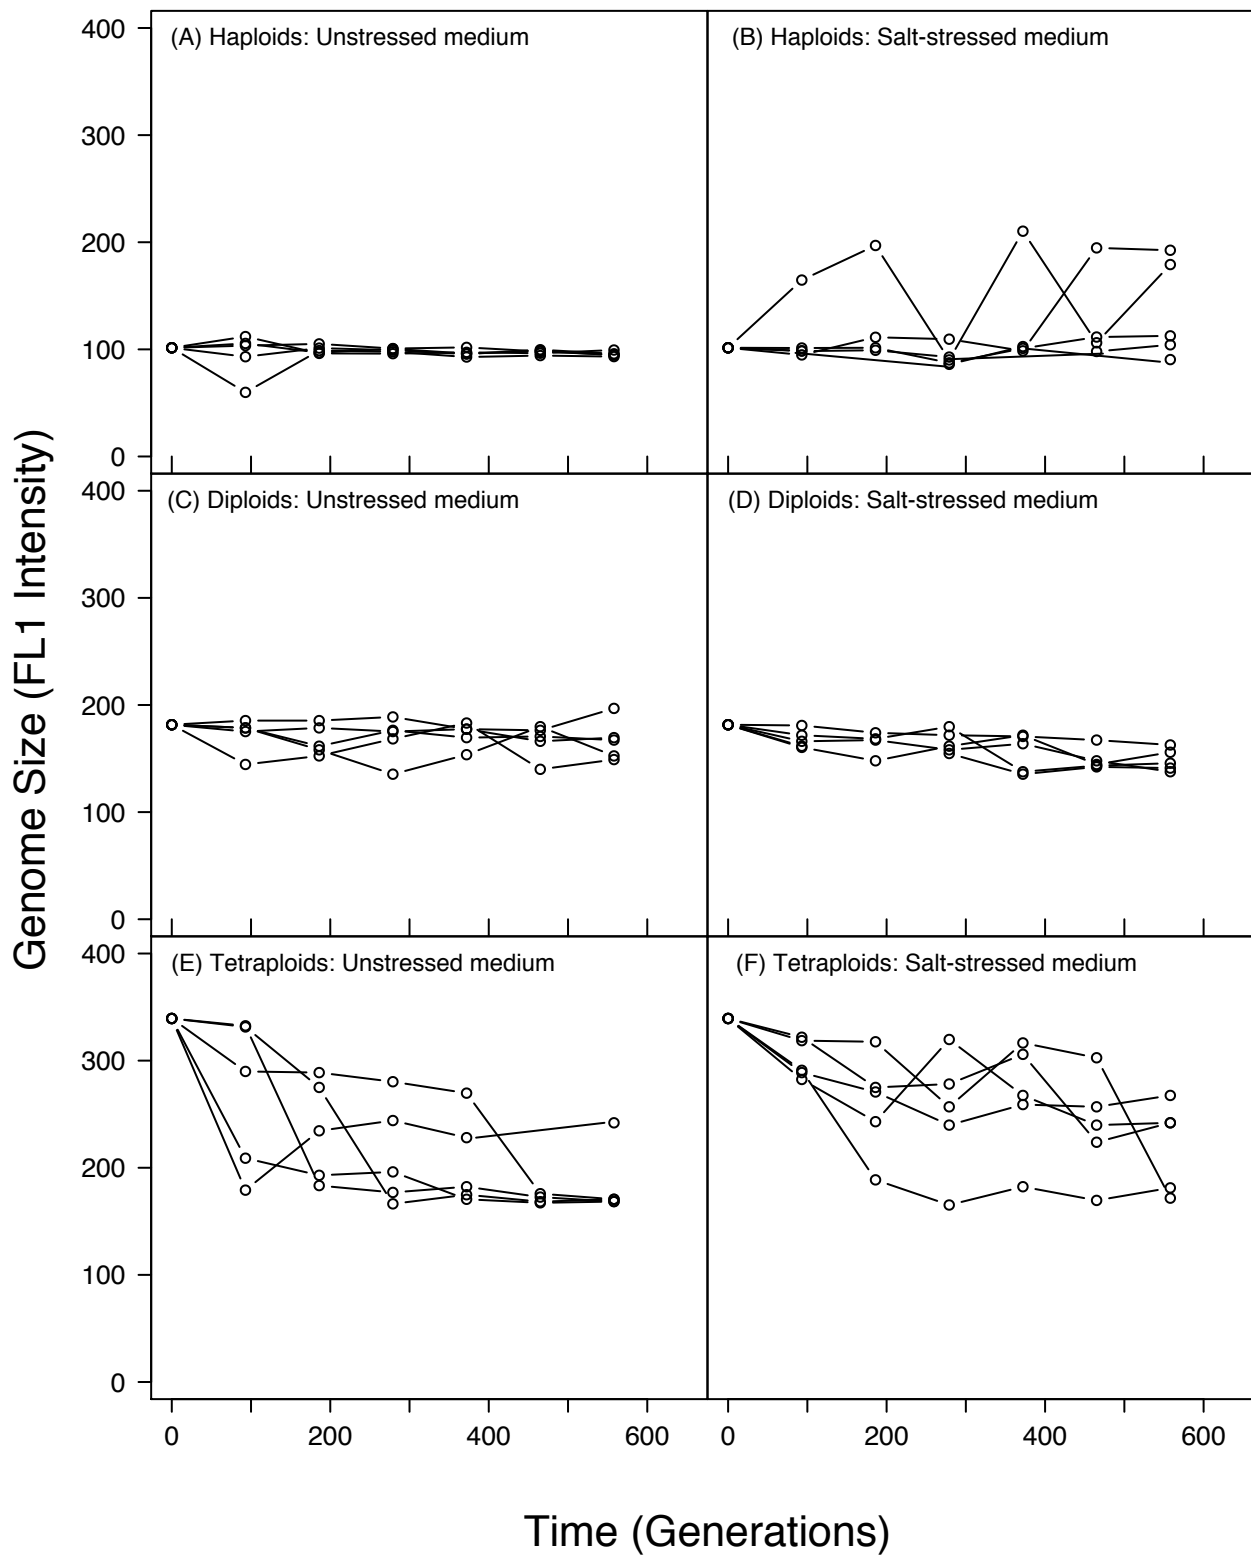

Supplement: pgen.0020145.sg002.pdf [file pgen.0020145.sg002.pdf]

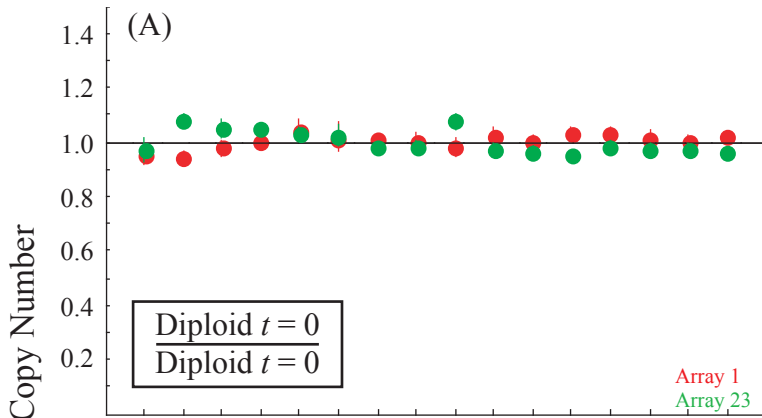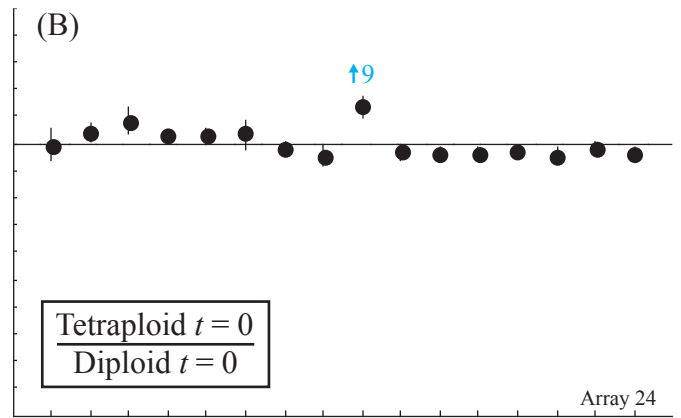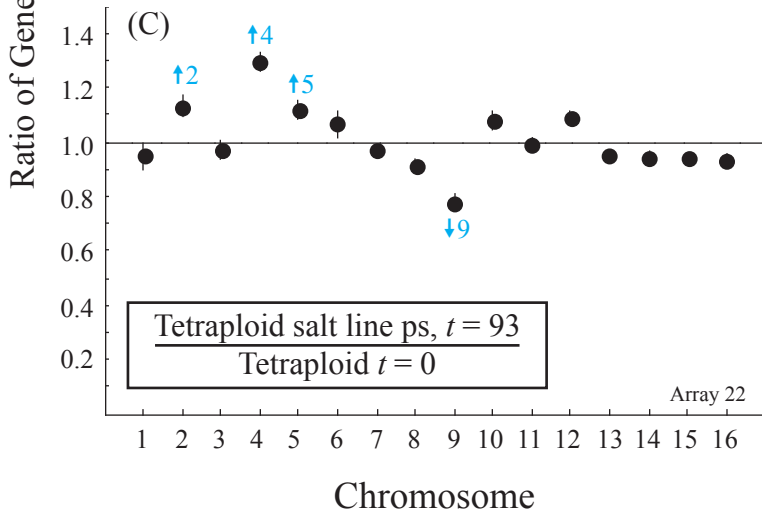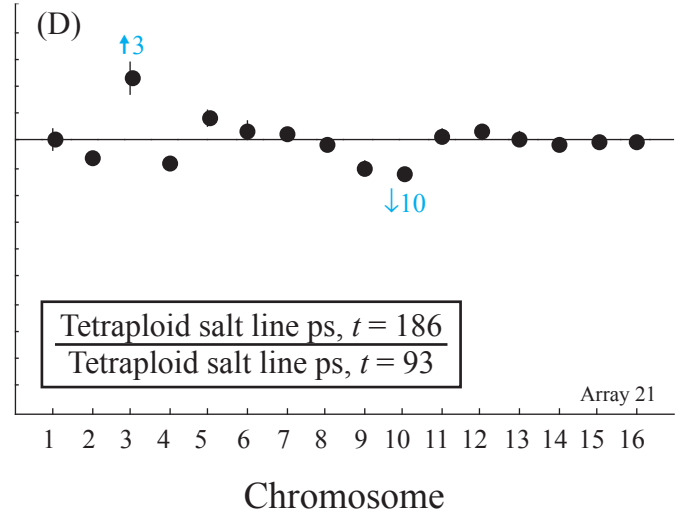

Supplement: pgen.0020145.sg003.pdf [file pgen.0020145.sg003.pdf]

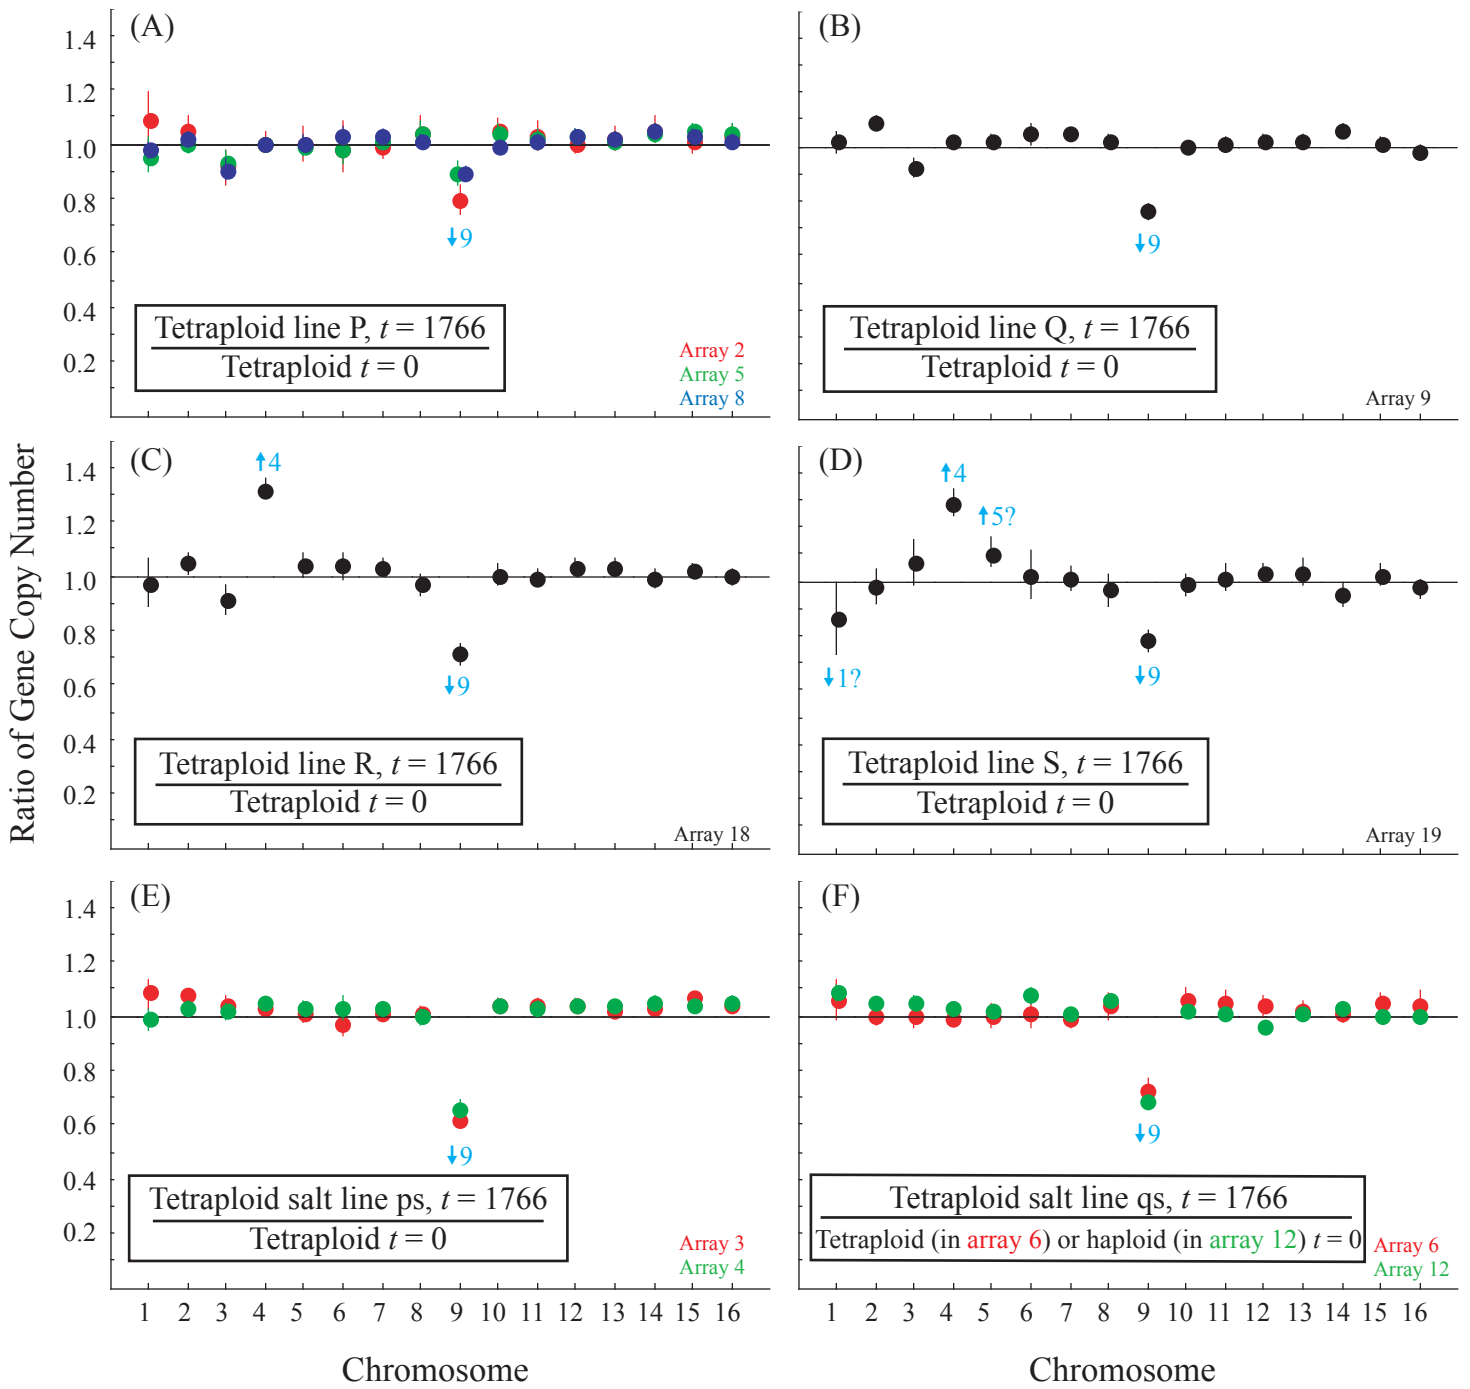

Supplement: pgen.0020145.sg004.pdf [file pgen.0020145.sg004.pdf]

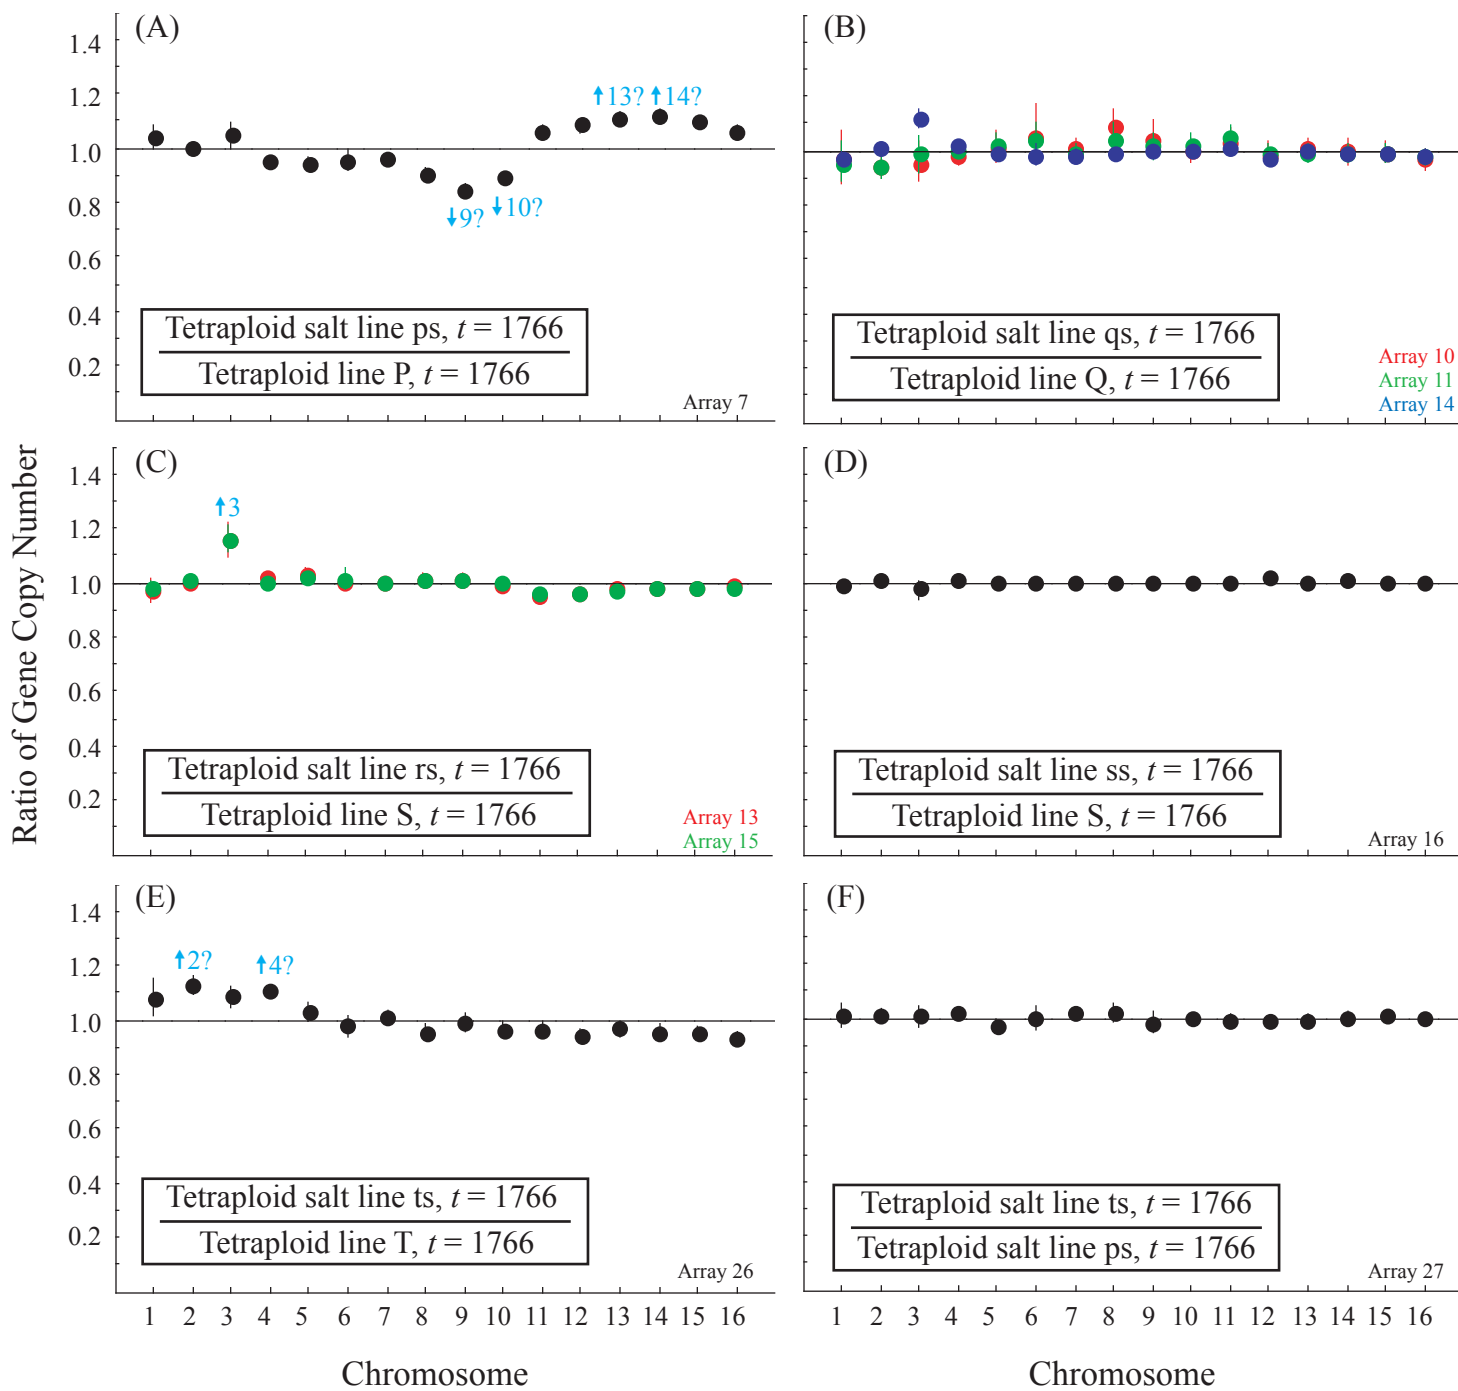

Supplement: pgen.0020145.sg005.pdf [file pgen.0020145.sg005.pdf]

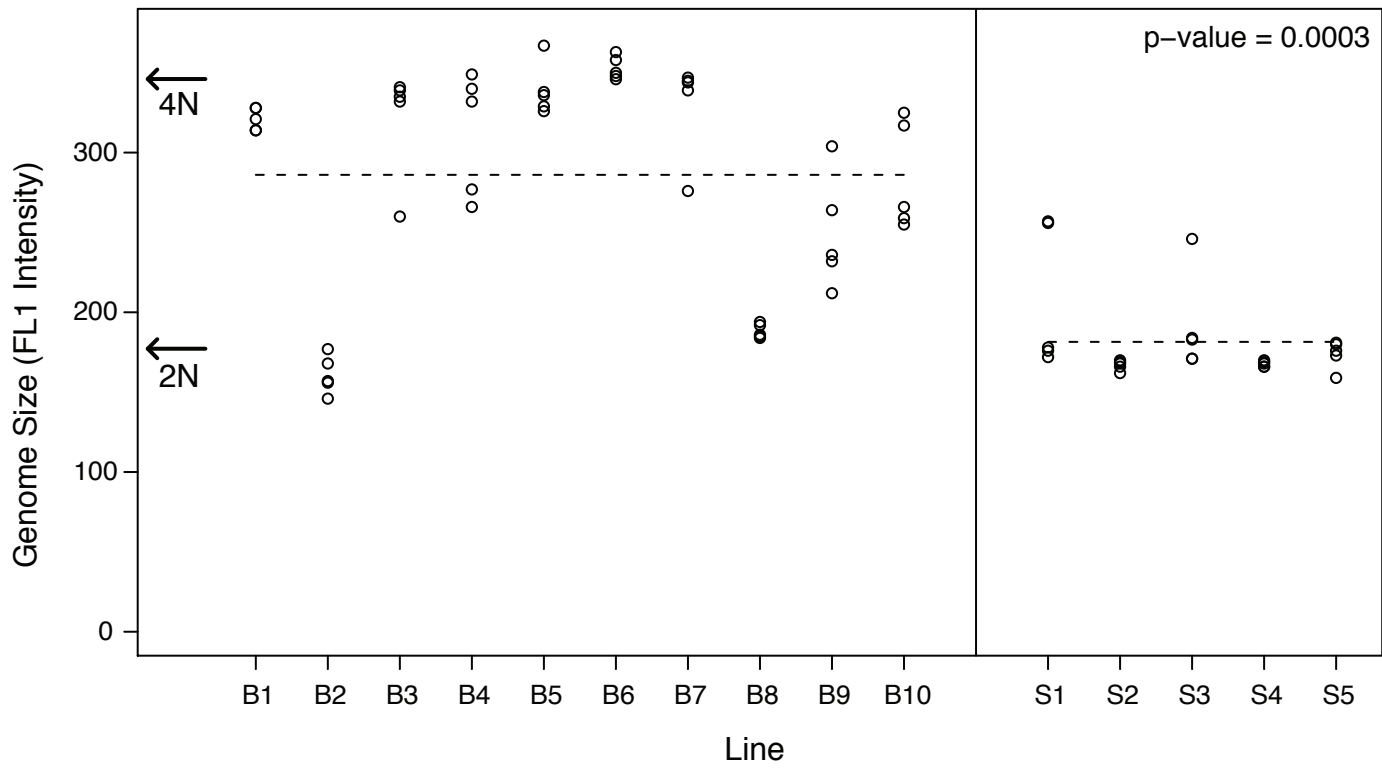

Supplement: pgen.0020145.sg007.pdf [file pgen.0020145.sg007.pdf]
